# Supplementary material for: The Effectiveness of Intermittent Fasting to Reduce Body Mass Index and Glucose Metabolism: A Systematic Review and Meta-Analysis
Source: PubMed Central journal article supplement (PMC6832593; doi:10.3390/jcm8101645), 2019-10-09
Supplement: jcm-08-01645-s001.pdf [file jcm-08-01645-s001.pdf]

## Supplementary Material

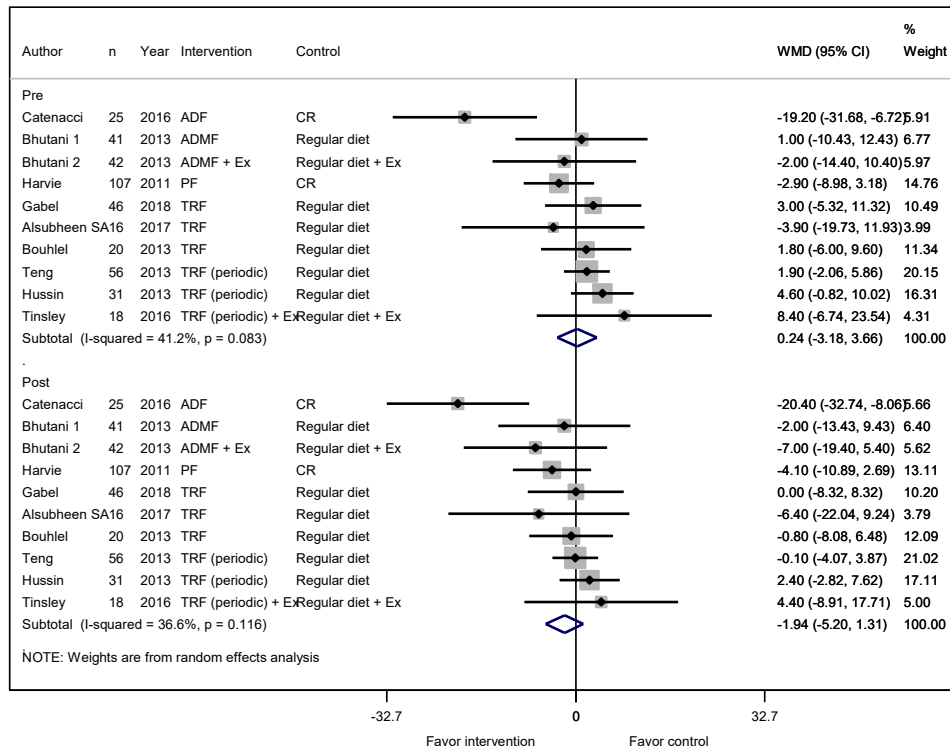

**Supplementary Figure 1.** Effect of intermittent fasting (IF) versus non-fasting control on body weight (changes from baseline) in adults without chronic metabolic disease. The squares indicate the study-specific outcome estimates, and the size of the squares corresponds to the study's weight in the meta-analysis. Horizontal lines denote the range of the 95% confidence interval. The diamonds indicate pooled estimates. Weights are from random effects analysis.

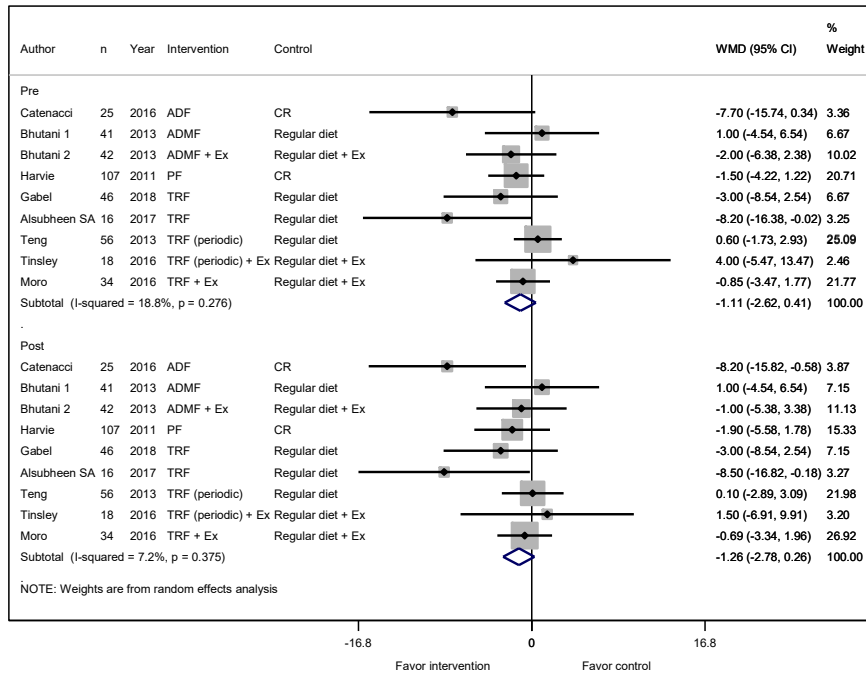

**Supplementary Figure 2.** Effect of IF versus non-fasting control on lean mass (changes from baseline) in adults without chronic metabolic disease.

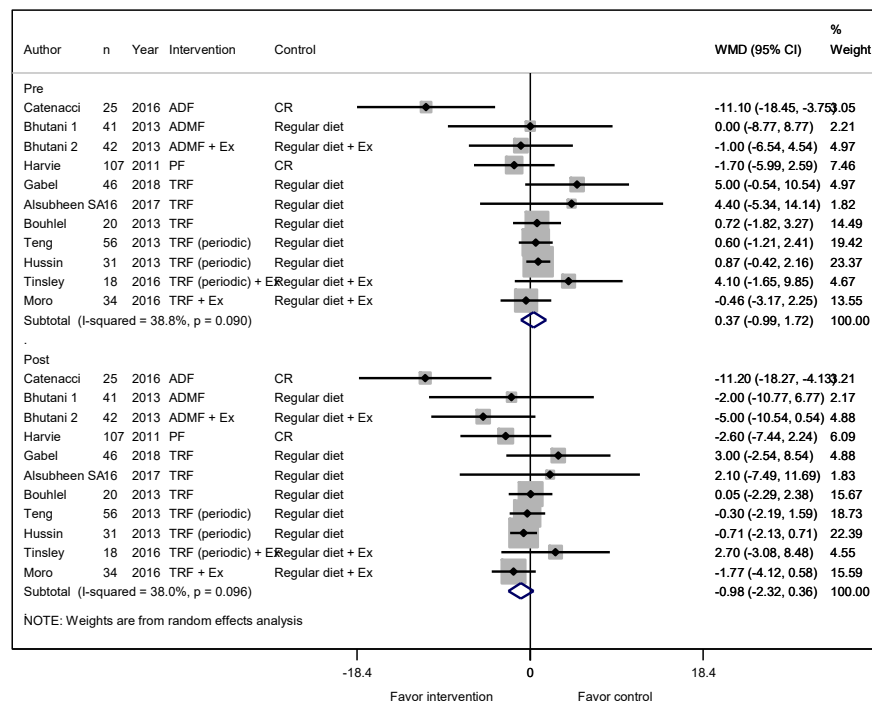

**Supplementary Figure 3.** Effect of IF versus non-fasting control on fat mass (changes from baseline) in adults without chronic metabolic disease.

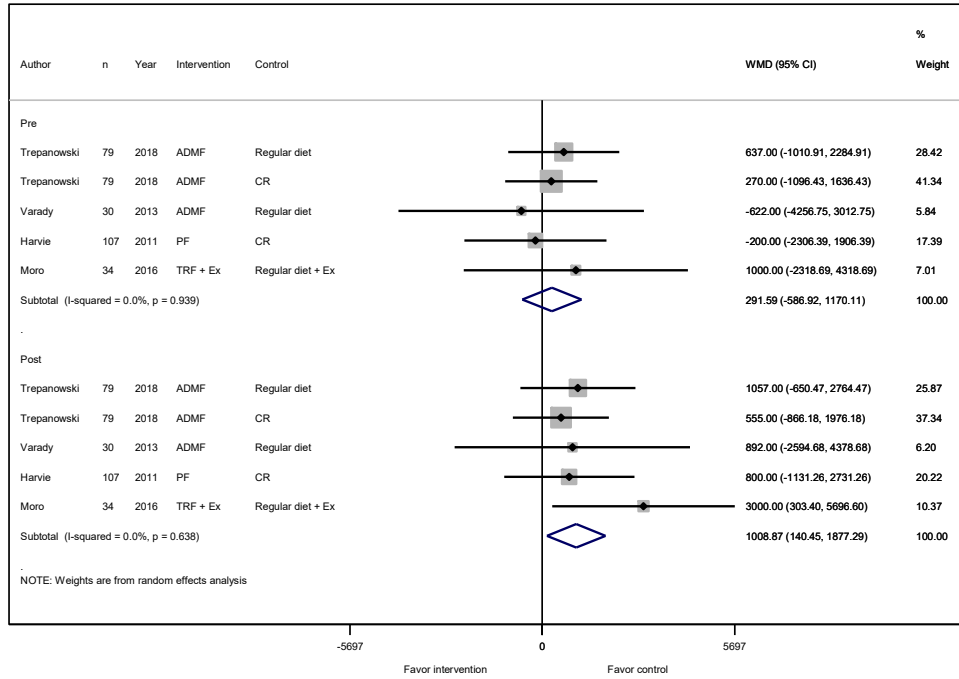

**Supplementary Figure 4.** Effect of IF versus non-fasting control on adiponectin concentration (changes from baseline) in adults without chronic metabolic disease.

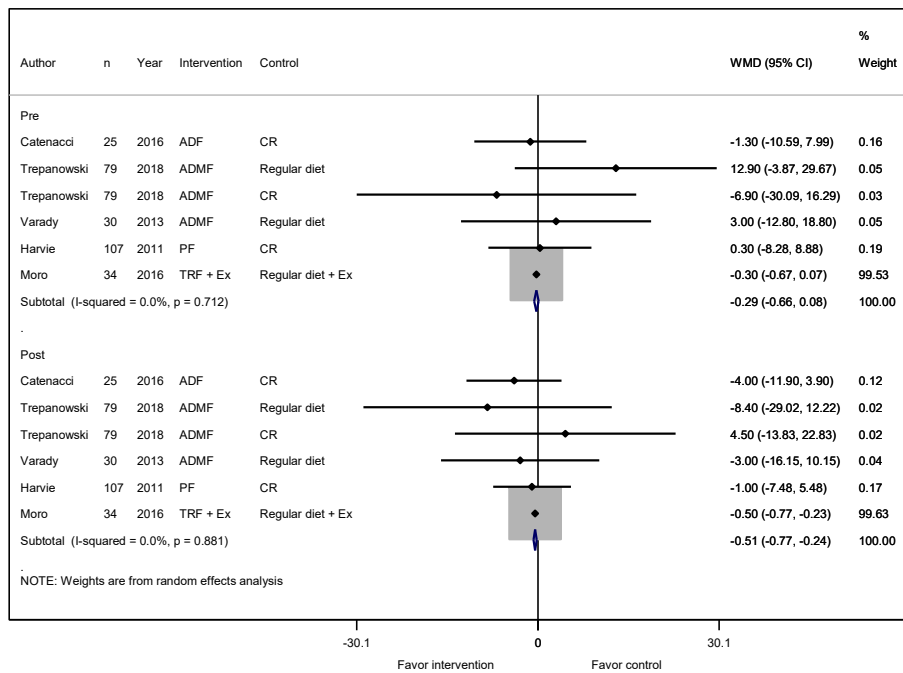

**Supplementary Figure 5.** Effect of IF versus non-fasting control on leptin level (changes from baseline) in adults without chronic metabolic disease.
